# Supplementary material for: Effect of Environmental Factors on Photovoltaic Soiling: Experimental and Statistical Analysis
Source: MDPI journal article supplement (doi:10.3390/en16010045), 2022-12-21
Supplement: s1 [file s1]

Archive with 1 entries (1 files):
- energies-2029477-supplementary.pdf
